# Supplementary material for: First-in-Human Dose-Escalation Study of the Novel Oral Depsipeptide Class I-Targeting HDAC Inhibitor Bocodepsin (OKI-179) in Patients with Advanced Solid Tumors
Source: MDPI journal article supplement (doi:10.3390/cancers16010091), 2023-12-23
Supplement: s1 [file s1]

**Table S1.** Treatment-Emergent Adverse Events by Grade in  $\geq 15\%$  of Patients Treated With Continuous Dosing of OKI-179

| System Organ Class<br>Preferred Term, N (%) | 200 mg<br>(N=6) |        |    |    | 300 mg<br>(N=2) |        |        |         | All Continuous Patients<br>(N=8) |        |        |        |            |
|---------------------------------------------|-----------------|--------|----|----|-----------------|--------|--------|---------|----------------------------------|--------|--------|--------|------------|
|                                             | G1              | G2     | G3 | G4 | G1              | G2     | G3     | G4      | G1                               | G2     | G3     | G4     | All grades |
| Constipation                                | 2 (33)          | 3 (50) | 0  | 0  | 1 (50)          | 0      | 0      | 0       | 3 (38)                           | 3 (38) | 0      | 0      | 6 (75)     |
| Nausea                                      | 2 (33)          | 2 (33) | 0  | 0  | 2 (100)         | 0      | 0      | 0       | 4 (50)                           | 2 (25) | 0      | 0      | 6 (75)     |
| Fatigue                                     | 1 (17)          | 2 (33) | 0  | 0  | 0               | 0      | 1 (50) | 0       | 1 (13)                           | 2 (25) | 1 (13) | 0      | 4 (50)     |
| Platelet count decreased                    | 1 (17)          | 1 (17) | 0  | 0  | 0               | 0      | 0      | 2 (100) | 1 (13)                           | 1 (13) | 0      | 2 (25) | 4 (50)     |
| Diarrhea                                    | 2 (33)          | 0      | 0  | 0  | 1 (50)          | 0      | 0      | 0       | 3 (38)                           | 0      | 0      | 0      | 3 (38)     |
| Headache                                    | 2 (33)          | 0      | 0  | 0  | 1 (50)          | 0      | 0      | 0       | 3 (38)                           | 0      | 0      | 0      | 3 (38)     |
| Decreased appetite                          | 1 (17)          | 0      | 0  | 0  | 0               | 0      | 1 (50) | 0       | 1 (13)                           | 0      | 1 (13) | 0      | 2 (25)     |
| Anemia                                      | 0               | 1 (17) | 0  | 0  | 0               | 1 (50) | 0      | 0       | 0                                | 2 (25) | 0      | 0      | 2 (25)     |
| Abdominal pain                              | 1 (17)          | 1 (17) | 0  | 0  | 0               | 0      | 0      | 0       | 1 (13)                           | 1 (13) | 0      | 0      | 2 (25)     |
| Dyspepsia                                   | 1 (17)          | 1 (17) | 0  | 0  | 0               | 0      | 0      | 0       | 1 (13)                           | 1 (13) | 0      | 0      | 2 (25)     |
| ECG QT prolonged                            | 1 (17)          | 1 (17) | 0  | 0  | 0               | 0      | 0      | 0       | 1 (13)                           | 1 (13) | 0      | 0      | 2 (25)     |
| Pain                                        | 1 (17)          | 1 (17) | 0  | 0  | 0               | 0      | 0      | 0       | 1 (13)                           | 1 (13) | 0      | 0      | 2 (25)     |

Graded using National Cancer Institute Common Terminology Criteria for Adverse Events (CTCAE), version 5. Abbreviations: Gr, Grade; N, Number. There were no Grade 5 TEAEs in patients treated with continuous dosing.

**Table S2.** Treatment-Emergent Adverse Events by Grade in  $\geq 15\%$  of Patients Treated With Intermittent Dosing of OKI-179 of 5 Days on / 2 Days Off (5:2)

| Adverse Event<br><i>N</i> (%)        | 300 mg<br>( <i>N</i> =6) |        |        |            |
|--------------------------------------|--------------------------|--------|--------|------------|
|                                      | G1                       | G2     | G3     | All grades |
| Nausea                               | 4 (67)                   | 0      | 1 (17) | 5 (83)     |
| Fatigue                              | 1 (17)                   | 3 (50) | 0      | 4 (67)     |
| Platelet count decreased             | 4 (67)                   | 0      | 0      | 4 (67)     |
| Vomiting                             | 2 (33)                   | 1 (17) | 0      | 3 (50)     |
| Decreased appetite                   | 0                        | 1 (17) | 1 (17) | 2 (33)     |
| Anemia                               | 1 (17)                   | 0      | 1 (17) | 2 (33)     |
| Back pain                            | 1 (17)                   | 0      | 1 (17) | 2 (33)     |
| ECG QT prolonged                     | 2 (33)                   | 0      | 0      | 2 (33)     |
| Bile duct stenosis                   | 0                        | 0      | 1 (17) | 1 (17)     |
| Enterococcal bacteremia              | 0                        | 0      | 1 (17) | 1 (17)     |
| Pneumothorax                         | 0                        | 0      | 1 (17) | 1 (17)     |
| Abdominal pain                       | 0                        | 1 (17) | 0      | 1 (17)     |
| Dysphagia                            | 0                        | 1 (17) | 0      | 1 (17)     |
| Esophagoscopy                        | 0                        | 1 (17) | 0      | 1 (17)     |
| Oropharyngeal pain                   | 0                        | 1 (17) | 0      | 1 (17)     |
| Pain in extremity                    | 0                        | 1 (17) | 0      | 1 (17)     |
| Pneumonitis                          | 0                        | 1 (17) | 0      | 1 (17)     |
| Aspartate aminotransferase increased | 1 (17)                   | 0      | 0      | 1 (17)     |
| Blood alkaline phosphatase increased | 1 (17)                   | 0      | 0      | 1 (17)     |
| Dehydration                          | 1 (17)                   | 0      | 0      | 1 (17)     |
| Eye pain                             | 1 (17)                   | 0      | 0      | 1 (17)     |
| Gastritis                            | 1 (17)                   | 0      | 0      | 1 (17)     |
| Hypomagnesaemia                      | 1 (17)                   | 0      | 0      | 1 (17)     |
| Myalgia                              | 1 (17)                   | 0      | 0      | 1 (17)     |
| Neutrophil count decreased           | 1 (17)                   | 0      | 0      | 1 (17)     |
| Esophagitis                          | 1 (17)                   | 0      | 0      | 1 (17)     |
| Paresthesia                          | 1 (17)                   | 0      | 0      | 1 (17)     |

Graded using National Cancer Institute Common Terminology Criteria for Adverse Events (CTCAE), version 5. Abbreviations: Gr, Grade; *N*, Number. There were no Grade 4 or Grade 5 TEAEs in patients treated with the 5:2 schedule.

**Table S3.** Summary of Key PK Parameters for the 300-mg 5:2 Regimen Cohort

| Analyte            | Cycle 1 Visit | C <sub>max</sub><br>(ng/mL) | T <sub>max</sub><br>(hr) | AUC <sub>last</sub><br>(hr*ng/mL) | t <sub>1/2</sub><br>(hr) | MR <sub>AUC</sub> |
|--------------------|---------------|-----------------------------|--------------------------|-----------------------------------|--------------------------|-------------------|
| OKI-179            | Day 1         | 142<br>(31.2%)              | 0.875<br>(0.517 - 2.00)  | 253<br>(101%)                     | 1.75<br>(0.672 - 2.83)   | NA                |
|                    | Day 15        | 215<br>(77.1%)              | 0.934<br>(0.550 - 1.93)  | 374<br>(126%)                     | 1.74<br>(1.09 - 2.40)    | NA                |
| OKI-006<br>(Free)  | Day 1         | 1770<br>(37.3%)             | 0.692<br>(0.500 - 1.05)  | 2790<br>(61.6%)                   | NA                       | 13.3<br>(59.7%)   |
|                    | Day 15        | 2220<br>(38.9%)             | 0.934<br>(0.500 - 1.93)  | 3180<br>(60.3%)                   | 3.43<br>(0.994 - 6.64)   | 10.3<br>(52.4%)   |
| OKI-006<br>(Total) | Day 1         | 1990<br>(36.2%)             | 0.942<br>(0.533 - 1.90)  | 6040<br>(60.6%)                   | 6.70<br>(6.14 - 7.07)    | 28.8<br>(65.2%)   |
|                    | Day 15        | 2420<br>(33.4%)             | 0.934<br>(0.500 - 1.93)  | 6420<br>(44.2%)                   | 6.53<br>(6.30 - 9.68)    | 20.7<br>(76.0%)   |

Values are geometric mean (%CV) for C<sub>max</sub>, AUC<sub>last</sub> and MR<sub>AUC</sub> for N=6 patients in the 300-mg 5:2 regimen cohort. Values are median (min-max) for T<sub>max</sub> and terminal t<sub>1/2</sub>. NA=not applicable. MR<sub>AUC</sub> is the OKI-006 to OKI-179 metabolite ratio based on AUC<sub>last</sub>.

**Table S4.** Mean Acetylation Fold Change from Baseline at 2 Hours Post-dose

| Dose (mg) | H3K9      |           |           | H3K27      |           |           | Total Lysine |           |           |
|-----------|-----------|-----------|-----------|------------|-----------|-----------|--------------|-----------|-----------|
|           | CD4       | CD8       | T-cell    | CD4        | CD8       | T-cell    | CD4          | CD8       | T-cell    |
| 30        | 1.4 (NA)  | 1.5 (NA)  | 1.4 (NA)  | 4.8 (NA)   | 5.2 (NA)  | 7.4 (NA)  | 1.6 (NA)     | 1.2 (NA)  | 1.6 (NA)  |
| 60        | 1.6 (0.6) | 1.8 (0.6) | 2.0 (0.8) | 6.0 (3.4)  | 3.7 (1.9) | 4.3 (4.3) | 1.4 (NA)     | 1.2 (NA)  | 1.3 (NA)  |
| 90        | 1.4 (NA)  | 2.4 (NA)  | 2.2 (NA)  | 2.1 (NA)   | 4.1 (NA)  | 4.2 (NA)  | 0.8 (NA)     | 1.8 (NA)  | 1.6 (NA)  |
| 120       | 2.5 (NA)  | 2.3 (NA)  | 2.5 (NA)  | 10.2 (NA)  | 10.1 (NA) | 9.3 (NA)  | 3.4 (NA)     | 4.0 (NA)  | 3.4 (NA)  |
| 180       | 3.3 (NA)  | 2.6 (NA)  | 3.1 (NA)  | 8.8 (NA)   | 6.2 (NA)  | 8.0 (NA)  | 3.0 (NA)     | 2.2 (NA)  | 2.7 (NA)  |
| 200       | 2.2 (1.7) | 2.3 (1.8) | 2.4 (1.8) | 3.7 (2.5)  | 4.0 (2.0) | 4.3 (2.5) | 2.1 (1.3)    | 1.9 (1.3) | 2.3 (1.4) |
| 210       | 3.6 (NA)  | 3.7 (NA)  | 3.8 (NA)  | 10.6 (NA)  | 10.6 (NA) | 10.9 (NA) | 4.0 (NA)     | 3.5 (NA)  | 3.7 (NA)  |
| 270       | 2.5 (0.7) | 2.4 (0.5) | 2.5 (0.6) | 8.0 (2.9)  | 6.6 (1.8) | 6.8 (2.3) | 2.9 (0.7)    | 2.6 (0.4) | 2.8 (0.5) |
| 300       | 1.6 (1.2) | 1.4 (0.7) | 1.5 (0.8) | 6.2 (4.3)  | 5.4 (2.9) | 5.9 (3.3) | 2.7 (2.2)    | 2.5 (1.7) | 2.7 (1.6) |
| 350       | 3.2 (0.1) | 1.0 (0.1) | 2.9 (0.1) | 10.8 (0.9) | 1.8 (0.3) | 9.6 (1.0) | 4.0 (0.1)    | 2.0 (NA)  | 3.9 (0.1) |
| 450       | 4.2 (2.9) | 4.5 (2.2) | 3.3 (1.9) | 9.7 (5.2)  | 8.8 (4.1) | 8.5 (3.5) | 3.2 (2.3)    | 2.6 (1.5) | 3.0 (2.1) |

Values are mean with standard deviation. NA=not applicable due to limited number of values.
